# Supplementary material for: Sample size calculation for estimating key epidemiological parameters using serological data and mathematical modelling
Source: Springer Nature journal article supplement (doi:10.1186/s12874-019-0692-1), 2019-03-07
Supplement: MOESM1 [file 16532582]

# Sample size calculation for estimating key epidemiological parameters using serological data and mathematical modelling

Stéphanie Blaizot, Sereina A. Herzog, Steven Abrams, Heidi Theeten, Amber Litzroth, Niel Hens

## Supplementary material

### Contents

|                                                                               |           |
|-------------------------------------------------------------------------------|-----------|
| <b>Age structures .....</b>                                                   | <b>2</b>  |
| <b>MSIRW model with boosting and age-specific waning (MSIRWb-ext AW).....</b> | <b>3</b>  |
| <b>Calculations of the key epidemiological parameters.....</b>                | <b>4</b>  |
| <b>Estimates of key epidemiological parameters .....</b>                      | <b>5</b>  |
| <b>Precision values.....</b>                                                  | <b>7</b>  |
| <b>Optimal distributions.....</b>                                             | <b>18</b> |
| <b>References .....</b>                                                       | <b>25</b> |

## Age structures

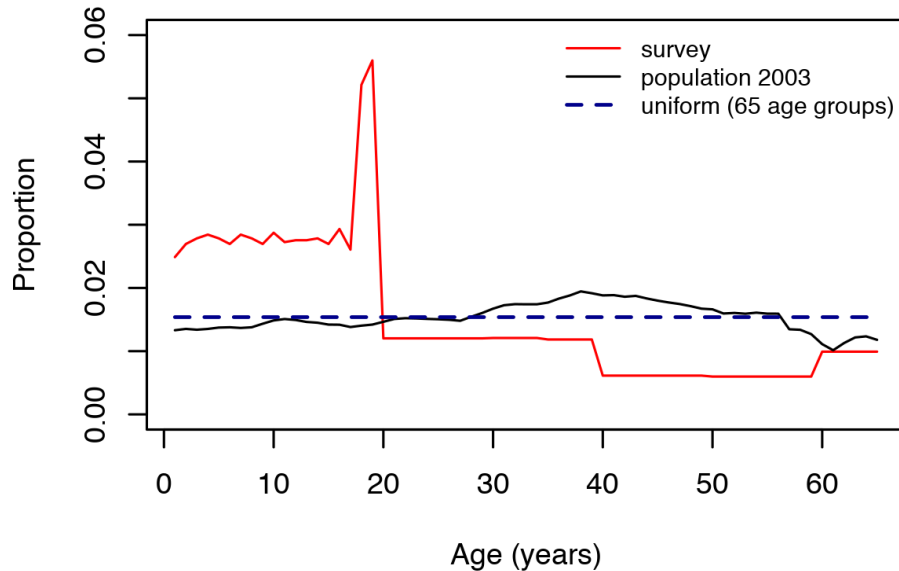

**Figure S1.** Comparison of the three age distributions.

“survey” (red line) refers to the age structure derived from the serological survey data (all individuals included, aged from 1 to 65 years old); “population 2003” (black line) refers to the age structure of the Belgian population in 2003; “uniform” (blue dashed line) refers to a uniform age structure based on 65 age groups (1-year interval).

**Table S1.** Distribution of the population among age groups by age structure

|                           | Age groups |           |            |             |             |             |
|---------------------------|------------|-----------|------------|-------------|-------------|-------------|
|                           | 1 year     | 2-5 years | 6-11 years | 12-18 years | 19-30 years | 31-65 years |
| <b>Population</b>         | 1.1%       | 4.5%      | 7.2%       | 8.4%        | 15.3%       | 63.5%       |
| <b>Uniform</b>            | 1.5%       | 6.2%      | 9.2%       | 10.8%       | 18.5%       | 53.8%       |
| <b>Serological survey</b> |            |           |            |             |             |             |
| Measles                   | 2.3%       | 11.1%     | 16.5%      | 20.9%       | 18.5%       | 30.6%       |
| Mumps                     | 2.5%       | 11.3%     | 16.3%      | 21.6%       | 18.6%       | 29.7%       |
| Rubella                   | 2.5%       | 11.2%     | 16.2%      | 21.4%       | 18.8%       | 29.9%       |
| Parvovirus B19            | 1.9%       | 9.3%      | 15.4%      | 21.7%       | 19.9%       | 31.8%       |
| VZV                       | 2.6%       | 11.3%     | 16.6%      | 21.7%       | 18.2%       | 29.8%       |

The “serological survey” structure refers to the structure of the pathogen-specific measures available. VZV: varicella-zoster virus.

### MSIRW model with boosting and age-specific waning (MSIRWb-ext AW)

In Goeyvaerts *et al.* (2011), different compartmental models were considered to infer on basic immunological processes for parvovirus B19 (Goeyvaerts *et al.* 2011). In the MSIRWb-ext AW model, they considered waning of disease-acquired antibodies. Individuals move at a rate  $\varepsilon(a)$  from a high immunity state R to a low immunity state W in which they are still protected from infection however categorized as being seronegative, that is, with antibody levels falling below the serostatus threshold (see Figure S2). In addition, they assumed that low immunity can be boosted by exposure to infectious individuals. The boosting rate and the force of infection are proportional with a proportionality constant  $\varphi$ , such that the rate at which individuals move back from W to R equals  $\varphi \cdot \lambda(a)$ . By solving the corresponding set of differential equations, one finds that the fraction in state S equals:

$$s(a) = \exp\left(-\int_A^a \lambda(u) du\right) \text{ if } a > A.$$

Approximating  $r(a)$  by  $1 - s(a) - w(a)$ ,  $\forall a > A$ , assuming  $i(a)$  is small relative to  $s(a)$  and  $w(a)$ , the following expression is obtained for the proportion seropositives (if  $a > A$ ):

$$r(a) = \int_A^a \left\{ (1 - \varphi) \lambda(u) \exp\left(-\int_A^u \lambda(v) dv\right) + \varphi \lambda(u) \right\} \exp\left(-\int_u^a \{\varphi \lambda(v) + \varepsilon(v)\} dv\right) du$$

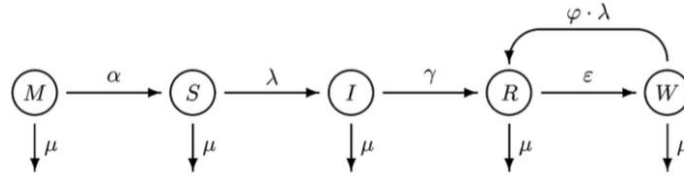

**Figure S2.** Illustration of the MSIRWb-ext compartmental model.

The estimation method assumes endemic and demographic equilibrium. The transmission rates  $\beta(a, a')$  are assumed to be directly proportional to age-specific rates of making social contact,  $c(a, a')$ , with a disease-specific proportionality factor  $q$  (“constant proportionality assumption”):  $\beta(a, a') = q \cdot c(a, a')$ . The contact rates are estimated from the POLYMOD contact survey using a non-parametric model (Goeyvaerts *et al.* 2010). Since the above integral equation has no closed-form solution, we turn to discrete age classes to estimate the parameters. Through an iterative procedure, the Bernoulli log-likelihood for the serological data is maximized. The waning rate is modelled as a piecewise constant function with a cut-off point at predetermined age  $H$ :  $\varepsilon(a) = \varepsilon_1$ , if  $a \in (A, H)$ , and  $\varepsilon(a) = \varepsilon_2$ , if  $a \geq H$ . Comparing the overall likelihood for different values of  $H$  (from 5 to 50 years in 5 years steps) led to the choice of  $H = 35$  years.

## Calculations of the key epidemiological parameters

- Calculation of the overall prevalence:  $\hat{p}_{overall} = \frac{\sum_a \hat{p}_a \times f_a}{\sum_a f_a}$  where  $\hat{p}_a$  is the estimated age-specific prevalence and  $f_a$  the proportion of individuals aged  $a$  from the population distribution.
- Calculation of the overall force of infection:  $\hat{\lambda}_{overall} = \frac{\sum_a \hat{\lambda}_a \times f_a \times (1 - \hat{p}_a)}{\sum_a f_a \times (1 - \hat{p}_a)}$  where  $\hat{\lambda}_a$  is the estimated age-specific force of infection,  $\hat{p}_a$  is the estimated age-specific prevalence and  $f_a$  the proportion of individuals aged  $a$  from the population distribution.
- Calculation of  $R_0$ :
  - Exponentially damped model:  $1 + \frac{L}{A_{inf}}$
  - MSIRWb-ext AW model (Goeyvaerts et al. 2011): dominant eigenvalue of  $G = \frac{ND}{L} (a_{[i+1]} - a_{[i]}) \beta_{ij}$  where  $\beta_{ij}$  denotes the per capita rate at which an individual of age class  $j$  makes an effective contact with a person of age class  $i$  per year.
- Calculation of the mean age at infection:
  - Exponentially damped model:  $A_{inf} = \int_0^U [1 - \pi(a)] da + [1 - \pi(U)] \times (L - U)$  in case that the data are observed up to a certain age  $U$  ( $U \leq L$ )
  - MSIRWb-ext AW model (Goeyvaerts et al. 2011):  $A_{inf} = \frac{\int_0^\infty a \lambda(a) s(a) N(a) / N(0) da}{n_{SI}}$  with  $n_{SI} = \int_0^\infty \lambda(a) s(a) N(a) / N(0) da$  the average number of infections per person during their lifetime
- Calculation of  $R_{eff}$  (MSIRWb-ext AW model, (Santermans et al. 2015)): dominant eigenvalue of  $G \times s(a)$

## Estimates of key epidemiological parameters

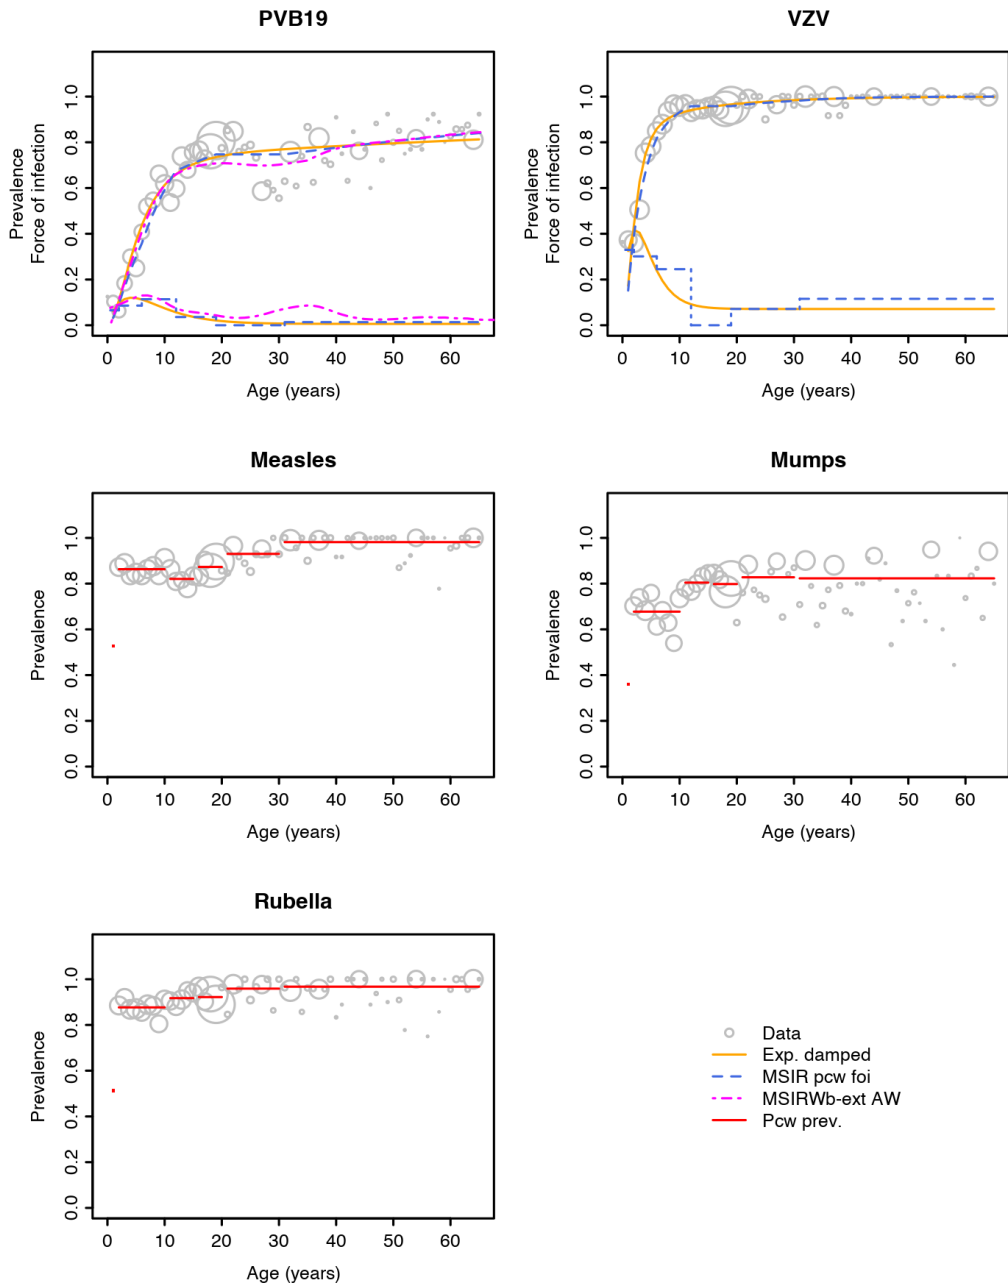

**Figure S3.** Estimated prevalence and force of infection for each of the pathogens.

Points are the observed data with circles proportional to sample size. PVB19: parvovirus B19; VZV: varicella-zoster virus; Exp. damped: exponentially damped model; MSIR – pcw foi: MSIR model with piecewise constant force of infection; MSIRWb-ext AW: MSIR model with boosting and age-specific waning; Pcw. prev: logistic model with piecewise constant prevalence.

**Table S2.** Estimates of the overall prevalence and prevalence by age groups by model and infection

|                                                        | <b>Prevalence</b> |           |            |             |             |             | Overall |
|--------------------------------------------------------|-------------------|-----------|------------|-------------|-------------|-------------|---------|
|                                                        | [1,2) yrs         | [2,6) yrs | [6,12) yrs | [12,19) yrs | [19,31) yrs | [31,65] yrs |         |
| <b>MSIR with piecewise constant force of infection</b> |                   |           |            |             |             |             |         |
| VZV                                                    | 18.3%             | 64.8%     | 91.0%      | 95.7%       | 97.1%       | 99.5%       | 95.0%   |
| B19                                                    | 3.8%              | 23.3%     | 53.8%      | 70.9%       | 74.8%       | 79.5%       | 71.5%   |
| <b>Exponentially damped model</b>                      |                   |           |            |             |             |             |         |
| VZV                                                    | 17.3%             | 65.7%     | 90.6%      | 95.3%       | 97.6%       | 99.4%       | 95.0%   |
| B19                                                    | 3.3%              | 24.1%     | 55.4%      | 69.9%       | 75.5%       | 79.1%       | 71.5%   |
| <b>MSIRWb-ext AW B19</b>                               |                   |           |            |             |             |             |         |
|                                                        | 4.1%              | 24.2%     | 56.7%      | 70.1%       | 70.4%       | 78.6%       | 70.5%   |
| <b>Logistic model</b>                                  |                   |           |            |             |             |             |         |
| Measles                                                | 52.7%             | 86.3%     | 85.6%      | 84.3%       | 92.1%       | 98.2%       | 93.3%   |
| Mumps                                                  | 36.0%             | 67.7%     | 70.0%      | 80.2%       | 82.3%       | 82.3%       | 79.6%   |
| Rubella                                                | 51.2%             | 87.7%     | 88.4%      | 91.9%       | 95.3%       | 96.7%       | 94.2%   |

All models are applied to data with integer age values.

**Table S3.** Estimates of the overall force of infection and force of infection by age groups by model and infection

|                                                        | <b>Force of infection</b> |           |            |             |             |             | Overall |
|--------------------------------------------------------|---------------------------|-----------|------------|-------------|-------------|-------------|---------|
|                                                        | [1,2) yrs                 | [2,6) yrs | [6,12) yrs | [12,19) yrs | [19,31) yrs | [31,65] yrs |         |
| <b>MSIR with piecewise constant force of infection</b> |                           |           |            |             |             |             |         |
| VZV                                                    | 0.404                     | 0.337     | 0.200      | 0.000       | 0.076       | 0.113       | 0.262   |
| B19                                                    | 0.077                     | 0.104     | 0.100      | 0.035       | 0.000       | 0.014       | 0.042   |
| <b>Exponentially damped model</b>                      |                           |           |            |             |             |             |         |
| VZV                                                    | 0.325                     | 0.385     | 0.168      | 0.081       | 0.071       | 0.071       | 0.260   |
| B19                                                    | 0.061                     | 0.111     | 0.091      | 0.039       | 0.012       | 0.006       | 0.040   |
| <b>MSIRWb-ext AW B19</b>                               |                           |           |            |             |             |             |         |
|                                                        | 0.090                     | 0.114     | 0.124      | 0.060       | 0.045       | 0.052       | 0.071   |

All models are applied to data with integer age values.

**Table S4.** Estimates of  $R_0$ , average age at infection, and  $R_{\text{eff}}$ , by model and infection

|                                   | $R_0$ | Average age at infection | $R_{\text{eff}}$ |
|-----------------------------------|-------|--------------------------|------------------|
| <b>Exponentially damped model</b> |       |                          |                  |
| VZV                               | 22.92 | 3.6                      | -                |
| B19                               | 4.65  | 21.6                     | -                |
| <b>MSIRWb-ext AW B19</b>          |       |                          |                  |
|                                   | 3.94  | 10.7                     | 1.06             |

All models are applied to data with integer age values.

## Precision values

In Tables S5-12, the following abbreviations are used:

survey: age structure derived from the serological survey data; uniform: uniform age structure; population: age structure of the Belgian population; OverallPrev: overall seroprevalence; Prev1 to Prev6: prevalence by age group ([1,2), [2,6), [6,12), [12,19), [19,31), and [31,65] years); OverallFoi: overall force of infection; Foi1 to Foi6: force of infection by age group ([1,2), [2,6), [6,12), [12,19), [19,31), and [31,65] years);  $R_0$ : basic reproduction number;  $R_{\text{eff}}$ : effective reproduction number; ASI: average age at infection.

**Table S5.** Measles serological data – Logistic model with piecewise constant prevalence

| Size  | Structure  | OverallPrev | Prev1  | Prev2  | Prev3  | Prev4  | Prev5  | Prev6  |
|-------|------------|-------------|--------|--------|--------|--------|--------|--------|
| 1650  | survey     | 0.0106      | 0.1579 | 0.0330 | 0.0292 | 0.0372 | 0.0289 | 0.0119 |
| 3300  | survey     | 0.0082      | 0.1104 | 0.0214 | 0.0193 | 0.0243 | 0.0214 | 0.0084 |
| 6600  | survey     | 0.0054      | 0.0796 | 0.0160 | 0.0143 | 0.0166 | 0.0153 | 0.0053 |
| 9900  | survey     | 0.0041      | 0.0628 | 0.0136 | 0.0115 | 0.0142 | 0.0125 | 0.0047 |
| 13200 | survey     | 0.0038      | 0.0552 | 0.0111 | 0.0100 | 0.0125 | 0.0110 | 0.0044 |
| 19800 | survey     | 0.0031      | 0.0478 | 0.0096 | 0.0081 | 0.0091 | 0.0085 | 0.0033 |
| 1650  | uniform    | 0.0110      | 0.2200 | 0.0434 | 0.0395 | 0.0463 | 0.0270 | 0.0083 |
| 3300  | uniform    | 0.0084      | 0.1353 | 0.0300 | 0.0274 | 0.0335 | 0.0197 | 0.0066 |
| 6600  | uniform    | 0.0055      | 0.0990 | 0.0215 | 0.0180 | 0.0226 | 0.0145 | 0.0042 |
| 9900  | uniform    | 0.0047      | 0.0789 | 0.0174 | 0.0153 | 0.0193 | 0.0118 | 0.0032 |
| 13200 | uniform    | 0.0038      | 0.0665 | 0.0153 | 0.0134 | 0.0169 | 0.0099 | 0.0032 |
| 19800 | uniform    | 0.0032      | 0.0559 | 0.0130 | 0.0110 | 0.0134 | 0.0084 | 0.0027 |
| 1650  | population | 0.0109      | 0.2045 | 0.0447 | 0.0425 | 0.0468 | 0.0273 | 0.0086 |
| 3300  | population | 0.0084      | 0.1423 | 0.0336 | 0.0287 | 0.0348 | 0.0196 | 0.0059 |
| 6600  | population | 0.0056      | 0.1023 | 0.0219 | 0.0190 | 0.0234 | 0.0147 | 0.0042 |
| 9900  | population | 0.0048      | 0.0833 | 0.0187 | 0.0160 | 0.0198 | 0.0119 | 0.0032 |
| 13200 | population | 0.0039      | 0.0710 | 0.0161 | 0.0144 | 0.0156 | 0.0102 | 0.0031 |
| 19800 | population | 0.0031      | 0.0625 | 0.0141 | 0.0116 | 0.0146 | 0.0081 | 0.0025 |

**Table S6.** Mumps serological data – Logistic model with piecewise constant prevalence

| <b>Size</b> | <b>Structure</b> | <b>OverallPrev</b> | <b>Prev1</b> | <b>Prev2</b> | <b>Prev3</b> | <b>Prev4</b> | <b>Prev5</b> | <b>Prev6</b> |
|-------------|------------------|--------------------|--------------|--------------|--------------|--------------|--------------|--------------|
| 1650        | survey           | 0.0207             | 0.1463       | 0.0439       | 0.0364       | 0.0367       | 0.0442       | 0.0316       |
| 3300        | survey           | 0.0153             | 0.0964       | 0.0320       | 0.0261       | 0.0251       | 0.0304       | 0.0233       |
| 6600        | survey           | 0.0112             | 0.0693       | 0.0212       | 0.0182       | 0.0171       | 0.0232       | 0.0164       |
| 9900        | survey           | 0.0093             | 0.0615       | 0.0184       | 0.0160       | 0.0149       | 0.0176       | 0.0138       |
| 13200       | survey           | 0.0075             | 0.0537       | 0.0161       | 0.0138       | 0.0129       | 0.0167       | 0.0111       |
| 19800       | survey           | 0.0065             | 0.0408       | 0.0133       | 0.0110       | 0.0099       | 0.0132       | 0.0104       |
| 1650        | uniform          | 0.0187             | 0.1800       | 0.0589       | 0.0527       | 0.0515       | 0.0443       | 0.0240       |
| 3300        | uniform          | 0.0136             | 0.1300       | 0.0406       | 0.0350       | 0.0371       | 0.0284       | 0.0181       |
| 6600        | uniform          | 0.0092             | 0.0941       | 0.0303       | 0.0248       | 0.0243       | 0.0211       | 0.0132       |
| 9900        | uniform          | 0.0078             | 0.0724       | 0.0243       | 0.0198       | 0.0210       | 0.0177       | 0.0106       |
| 13200       | uniform          | 0.0065             | 0.0640       | 0.0194       | 0.0169       | 0.0178       | 0.0157       | 0.0083       |
| 19800       | uniform          | 0.0054             | 0.0551       | 0.0181       | 0.0154       | 0.0156       | 0.0121       | 0.0076       |
| 1650        | population       | 0.0182             | 0.2045       | 0.0617       | 0.0538       | 0.0508       | 0.0427       | 0.0226       |
| 3300        | population       | 0.0140             | 0.1364       | 0.0439       | 0.0367       | 0.0358       | 0.0278       | 0.0171       |
| 6600        | population       | 0.0093             | 0.0996       | 0.0313       | 0.0260       | 0.0263       | 0.0211       | 0.0125       |
| 9900        | population       | 0.0078             | 0.0758       | 0.0244       | 0.0205       | 0.0215       | 0.0168       | 0.0107       |
| 13200       | population       | 0.0063             | 0.0668       | 0.0211       | 0.0181       | 0.0171       | 0.0150       | 0.0081       |
| 19800       | population       | 0.0054             | 0.0606       | 0.0189       | 0.0158       | 0.0149       | 0.0117       | 0.0075       |



**Table S7.** Rubella serological data – Logistic model with piecewise constant prevalence

| <b>Size</b> | <b>Structure</b> | <b>OverallPrev</b> | <b>Prev1</b> | <b>Prev2</b> | <b>Prev3</b> | <b>Prev4</b> | <b>Prev5</b> | <b>Prev6</b> |
|-------------|------------------|--------------------|--------------|--------------|--------------|--------------|--------------|--------------|
| 1650        | survey           | 0.0111             | 0.1548       | 0.0336       | 0.0279       | 0.0251       | 0.0220       | 0.0152       |
| 3300        | survey           | 0.0085             | 0.1084       | 0.0215       | 0.0183       | 0.0174       | 0.0171       | 0.0120       |
| 6600        | survey           | 0.0057             | 0.0723       | 0.0161       | 0.0139       | 0.0121       | 0.0123       | 0.0076       |
| 9900        | survey           | 0.0046             | 0.0622       | 0.0133       | 0.0112       | 0.0110       | 0.0100       | 0.0061       |
| 13200       | survey           | 0.0037             | 0.0557       | 0.0113       | 0.0095       | 0.0090       | 0.0083       | 0.0054       |
| 19800       | survey           | 0.0033             | 0.0462       | 0.0091       | 0.0078       | 0.0072       | 0.0073       | 0.0043       |
| 1650        | uniform          | 0.0105             | 0.2000       | 0.0423       | 0.0370       | 0.0345       | 0.0215       | 0.0120       |
| 3300        | uniform          | 0.0074             | 0.1300       | 0.0312       | 0.0256       | 0.0240       | 0.0154       | 0.0080       |
| 6600        | uniform          | 0.0055             | 0.0967       | 0.0204       | 0.0177       | 0.0168       | 0.0118       | 0.0057       |
| 9900        | uniform          | 0.0046             | 0.0822       | 0.0170       | 0.0146       | 0.0146       | 0.0088       | 0.0043       |
| 13200       | uniform          | 0.0037             | 0.0678       | 0.0151       | 0.0131       | 0.0117       | 0.0075       | 0.0038       |
| 19800       | uniform          | 0.0032             | 0.0593       | 0.0122       | 0.0103       | 0.0100       | 0.0062       | 0.0034       |
| 1650        | population       | 0.0105             | 0.2045       | 0.0411       | 0.0376       | 0.0346       | 0.0231       | 0.0113       |
| 3300        | population       | 0.0075             | 0.1477       | 0.0329       | 0.0269       | 0.0241       | 0.0152       | 0.0077       |
| 6600        | population       | 0.0053             | 0.1026       | 0.0213       | 0.0184       | 0.0175       | 0.0114       | 0.0058       |
| 9900        | population       | 0.0045             | 0.0871       | 0.0177       | 0.0146       | 0.0146       | 0.0089       | 0.0043       |
| 13200       | population       | 0.0037             | 0.0739       | 0.0158       | 0.0136       | 0.0122       | 0.0076       | 0.0036       |
| 19800       | population       | 0.0033             | 0.0625       | 0.0137       | 0.0113       | 0.0106       | 0.0065       | 0.0033       |

**Table S8.** VZV serological data – Exponentially damped model

| <b>Size</b> | <b>Structure</b> | <b>OverallPrev</b> | <b>Prev1</b> | <b>Prev2</b> | <b>Prev3</b> | <b>Prev4</b> | <b>Prev5</b> | <b>Prev6</b> |
|-------------|------------------|--------------------|--------------|--------------|--------------|--------------|--------------|--------------|
| 1650        | survey           | 0.0071             | 0.0520       | 0.0591       | 0.0250       | 0.0142       | 0.0102       | 0.0056       |
| 3300        | survey           | 0.0049             | 0.0333       | 0.0386       | 0.0160       | 0.0103       | 0.0069       | 0.0043       |
| 6600        | survey           | 0.0037             | 0.0240       | 0.0285       | 0.0126       | 0.0075       | 0.0048       | 0.0028       |
| 9900        | survey           | 0.0026             | 0.0220       | 0.0242       | 0.0103       | 0.0059       | 0.0031       | 0.0018       |
| 13200       | survey           | 0.0023             | 0.0184       | 0.0206       | 0.0087       | 0.0052       | 0.0032       | 0.0020       |
| 19800       | survey           | 0.0021             | 0.0142       | 0.0156       | 0.0068       | 0.0045       | 0.0027       | 0.0016       |
| 1650        | uniform          | 0.0085             | 0.0716       | 0.0785       | 0.0320       | 0.0182       | 0.0091       | 0.0041       |
| 3300        | uniform          | 0.0060             | 0.0493       | 0.0585       | 0.0212       | 0.0131       | 0.0067       | 0.0032       |
| 6600        | uniform          | 0.0040             | 0.0328       | 0.0386       | 0.0152       | 0.0095       | 0.0047       | 0.0021       |
| 9900        | uniform          | 0.0038             | 0.0268       | 0.0307       | 0.0127       | 0.0077       | 0.0038       | 0.0018       |
| 13200       | uniform          | 0.0031             | 0.0234       | 0.0280       | 0.0114       | 0.0064       | 0.0032       | 0.0015       |
| 19800       | uniform          | 0.0023             | 0.0195       | 0.0227       | 0.0084       | 0.0056       | 0.0026       | 0.0013       |
| 1650        | population       | 0.0090             | 0.0779       | 0.0881       | 0.0323       | 0.0187       | 0.0091       | 0.0041       |
| 3300        | population       | 0.0057             | 0.0508       | 0.0572       | 0.0226       | 0.0131       | 0.0065       | 0.0029       |
| 6600        | population       | 0.0042             | 0.0352       | 0.0412       | 0.0154       | 0.0101       | 0.0047       | 0.0022       |
| 9900        | population       | 0.0035             | 0.0284       | 0.0325       | 0.0128       | 0.0082       | 0.0039       | 0.0017       |
| 13200       | population       | 0.0029             | 0.0255       | 0.0282       | 0.0115       | 0.0069       | 0.0032       | 0.0014       |
| 19800       | population       | 0.0025             | 0.0205       | 0.0252       | 0.0091       | 0.0056       | 0.0027       | 0.0012       |
| <b>Size</b> | <b>Structure</b> | <b>OverallFoi</b>  | <b>Foi1</b>  | <b>Foi2</b>  | <b>Foi3</b>  | <b>Foi4</b>  | <b>Foi5</b>  | <b>Foi6</b>  |
| 1650        | survey           | 0.0353             | 0.0906       | 0.0518       | 0.0473       | 0.0359       | 0.0434       | 0.0441       |
| 3300        | survey           | 0.0239             | 0.0603       | 0.0326       | 0.0350       | 0.0234       | 0.0288       | 0.0291       |
| 6600        | survey           | 0.0179             | 0.0434       | 0.0236       | 0.0244       | 0.0146       | 0.0187       | 0.0189       |
| 9900        | survey           | 0.0129             | 0.0395       | 0.0185       | 0.0230       | 0.0101       | 0.0138       | 0.0141       |
| 13200       | survey           | 0.0114             | 0.0325       | 0.0171       | 0.0182       | 0.0115       | 0.0146       | 0.0148       |
| 19800       | survey           | 0.0100             | 0.0252       | 0.0120       | 0.0153       | 0.0082       | 0.0108       | 0.0109       |
| 1650        | uniform          | 0.0416             | 0.1268       | 0.0658       | 0.0616       | 0.0280       | 0.0330       | 0.0338       |
| 3300        | uniform          | 0.0294             | 0.0891       | 0.0439       | 0.0470       | 0.0192       | 0.0245       | 0.0251       |
| 6600        | uniform          | 0.0195             | 0.0601       | 0.0299       | 0.0341       | 0.0134       | 0.0163       | 0.0168       |
| 9900        | uniform          | 0.0176             | 0.0474       | 0.0257       | 0.0268       | 0.0102       | 0.0133       | 0.0137       |
| 13200       | uniform          | 0.0150             | 0.0425       | 0.0220       | 0.0227       | 0.0086       | 0.0115       | 0.0118       |
| 19800       | uniform          | 0.0113             | 0.0352       | 0.0174       | 0.0198       | 0.0070       | 0.0089       | 0.0092       |
| 1650        | population       | 0.0433             | 0.1410       | 0.0689       | 0.0659       | 0.0273       | 0.0339       | 0.0351       |
| 3300        | population       | 0.0279             | 0.0907       | 0.0452       | 0.0487       | 0.0184       | 0.0251       | 0.0257       |
| 6600        | population       | 0.0201             | 0.0629       | 0.0309       | 0.0362       | 0.0133       | 0.0162       | 0.0166       |
| 9900        | population       | 0.0172             | 0.0509       | 0.0249       | 0.0282       | 0.0098       | 0.0132       | 0.0135       |
| 13200       | population       | 0.0143             | 0.0453       | 0.0241       | 0.0253       | 0.0086       | 0.0113       | 0.0115       |
| 19800       | population       | 0.0118             | 0.0371       | 0.0186       | 0.0211       | 0.0072       | 0.0090       | 0.0092       |

| <b>Size</b> | <b>Structure</b> | <b>R<sub>0</sub></b> | <b>ASI</b> |
|-------------|------------------|----------------------|------------|
| 1650        | survey           | 3.0545               | 0.4995     |
| 3300        | survey           | 2.1016               | 0.3472     |
| 6600        | survey           | 1.5552               | 0.2533     |
| 9900        | survey           | 1.1384               | 0.1840     |
| 13200       | survey           | 0.9811               | 0.1599     |
| 19800       | survey           | 0.8942               | 0.1464     |
| 1650        | uniform          | 3.7604               | 0.5920     |
| 3300        | uniform          | 2.5140               | 0.4081     |
| 6600        | uniform          | 1.7357               | 0.2816     |
| 9900        | uniform          | 1.6336               | 0.2674     |
| 13200       | uniform          | 1.3314               | 0.2190     |
| 19800       | uniform          | 1.0348               | 0.1679     |
| 1650        | population       | 3.9463               | 0.6310     |
| 3300        | population       | 2.4735               | 0.4046     |
| 6600        | population       | 1.8329               | 0.3006     |
| 9900        | population       | 1.5411               | 0.2524     |
| 13200       | population       | 1.2795               | 0.2096     |
| 19800       | population       | 1.0671               | 0.1741     |

**Table S9.** VZV serological data – MSIR piecewise constant force of infection

| <b>Size</b> | <b>Structure</b> | <b>OverallPrev</b> | <b>Prev1</b> | <b>Prev2</b> | <b>Prev3</b> | <b>Prev4</b> | <b>Prev5</b> | <b>Prev6</b> |
|-------------|------------------|--------------------|--------------|--------------|--------------|--------------|--------------|--------------|
| 1650        | survey           | 0.0073             | 0.0575       | 0.0610       | 0.0251       | 0.0162       | 0.0136       | 0.0046       |
| 3300        | survey           | 0.0049             | 0.0359       | 0.0402       | 0.0177       | 0.0115       | 0.0101       | 0.0038       |
| 6600        | survey           | 0.0038             | 0.0279       | 0.0292       | 0.0128       | 0.0079       | 0.0071       | 0.0028       |
| 9900        | survey           | 0.0030             | 0.0221       | 0.0236       | 0.0103       | 0.0068       | 0.0054       | 0.0023       |
| 13200       | survey           | 0.0024             | 0.0210       | 0.0204       | 0.0090       | 0.0057       | 0.0047       | 0.0020       |
| 19800       | survey           | 0.0020             | 0.0158       | 0.0159       | 0.0073       | 0.0050       | 0.0040       | 0.0016       |
| 1650        | uniform          | 0.0087             | 0.0798       | 0.0764       | 0.0352       | 0.0226       | 0.0137       | 0.0038       |
| 3300        | uniform          | 0.0060             | 0.0543       | 0.0557       | 0.0254       | 0.0158       | 0.0102       | 0.0029       |
| 6600        | uniform          | 0.0042             | 0.0342       | 0.0387       | 0.0172       | 0.0111       | 0.0072       | 0.0022       |
| 9900        | uniform          | 0.0036             | 0.0314       | 0.0310       | 0.0137       | 0.0097       | 0.0055       | 0.0017       |
| 13200       | uniform          | 0.0032             | 0.0259       | 0.0287       | 0.0119       | 0.0081       | 0.0050       | 0.0014       |
| 19800       | uniform          | 0.0023             | 0.0217       | 0.0221       | 0.0097       | 0.0062       | 0.0038       | 0.0012       |
| 1650        | population       | 0.0089             | 0.0842       | 0.0880       | 0.0360       | 0.0222       | 0.0140       | 0.0037       |
| 3300        | population       | 0.0061             | 0.0564       | 0.0587       | 0.0249       | 0.0167       | 0.0101       | 0.0028       |
| 6600        | population       | 0.0043             | 0.0373       | 0.0417       | 0.0173       | 0.0116       | 0.0071       | 0.0021       |
| 9900        | population       | 0.0036             | 0.0305       | 0.0339       | 0.0142       | 0.0098       | 0.0056       | 0.0016       |
| 13200       | population       | 0.0031             | 0.0292       | 0.0305       | 0.0131       | 0.0080       | 0.0049       | 0.0014       |
| 19800       | population       | 0.0025             | 0.0219       | 0.0241       | 0.0104       | 0.0065       | 0.0039       | 0.0012       |

  

| <b>Size</b> | <b>Structure</b> | <b>OverallFoi</b> | <b>Foi1</b> | <b>Foi2</b> | <b>Foi3</b> | <b>Foi4</b> | <b>Foi5</b> | <b>Foi6</b> |
|-------------|------------------|-------------------|-------------|-------------|-------------|-------------|-------------|-------------|
| 1650        | survey           | 0.0383            | 0.1416      | 0.1307      | 0.1137      | 0.0711      | 0.0894      | 0.3651      |
| 3300        | survey           | 0.0263            | 0.0879      | 0.0910      | 0.0853      | 0.0461      | 0.0774      | 0.2816      |
| 6600        | survey           | 0.0200            | 0.0683      | 0.0560      | 0.0573      | 0.0389      | 0.0570      | 0.1015      |
| 9900        | survey           | 0.0152            | 0.0542      | 0.0502      | 0.0470      | 0.0285      | 0.0482      | 0.0778      |
| 13200       | survey           | 0.0134            | 0.0514      | 0.0439      | 0.0417      | 0.0253      | 0.0379      | 0.0610      |
| 19800       | survey           | 0.0110            | 0.0386      | 0.0365      | 0.0316      | 0.0207      | 0.0294      | 0.0480      |
| 1650        | uniform          | 0.0461            | 0.1983      | 0.1555      | 0.1422      | 0.0919      | 0.0892      | 0.2131      |
| 3300        | uniform          | 0.0340            | 0.1339      | 0.1216      | 0.1100      | 0.0661      | 0.0717      | 0.1013      |
| 6600        | uniform          | 0.0240            | 0.0837      | 0.0834      | 0.0807      | 0.0454      | 0.0584      | 0.0679      |
| 9900        | uniform          | 0.0189            | 0.0772      | 0.0660      | 0.0626      | 0.0420      | 0.0463      | 0.0496      |
| 13200       | uniform          | 0.0159            | 0.0633      | 0.0516      | 0.0536      | 0.0361      | 0.0402      | 0.0430      |
| 19800       | uniform          | 0.0125            | 0.0531      | 0.0471      | 0.0430      | 0.0266      | 0.0317      | 0.0364      |
| 1650        | population       | 0.0453            | 0.2088      | 0.1763      | 0.1616      | 0.0937      | 0.0819      | 0.2257      |
| 3300        | population       | 0.0336            | 0.1386      | 0.1282      | 0.1117      | 0.0661      | 0.0671      | 0.0989      |
| 6600        | population       | 0.0233            | 0.0915      | 0.0869      | 0.0866      | 0.0446      | 0.0593      | 0.0645      |
| 9900        | population       | 0.0190            | 0.0748      | 0.0691      | 0.0652      | 0.0405      | 0.0445      | 0.0540      |
| 13200       | population       | 0.0158            | 0.0715      | 0.0587      | 0.0567      | 0.0379      | 0.0383      | 0.0439      |
| 19800       | population       | 0.0131            | 0.0537      | 0.0486      | 0.0471      | 0.0255      | 0.0315      | 0.0331      |

**Table S10.** Parvovirus B19 serological data – Exponentially damped model

| <b>Size</b> | <b>Structure</b> | <b>OverallPrev</b> | <b>Prev1</b> | <b>Prev2</b> | <b>Prev3</b> | <b>Prev4</b> | <b>Prev5</b> | <b>Prev6</b> |
|-------------|------------------|--------------------|--------------|--------------|--------------|--------------|--------------|--------------|
| 1650        | survey           | 0.0215             | 0.0094       | 0.0415       | 0.0391       | 0.0305       | 0.0285       | 0.0294       |
| 3300        | survey           | 0.0148             | 0.0074       | 0.0321       | 0.0298       | 0.0213       | 0.0202       | 0.0208       |
| 6600        | survey           | 0.0106             | 0.0049       | 0.0213       | 0.0203       | 0.0156       | 0.0148       | 0.0148       |
| 9900        | survey           | 0.0092             | 0.0039       | 0.0175       | 0.0163       | 0.0115       | 0.0120       | 0.0138       |
| 13200       | survey           | 0.0073             | 0.0033       | 0.0144       | 0.0135       | 0.0099       | 0.0105       | 0.0109       |
| 19800       | survey           | 0.0071             | 0.0029       | 0.0132       | 0.0117       | 0.0087       | 0.0085       | 0.0100       |
| 1650        | uniform          | 0.0199             | 0.0126       | 0.0552       | 0.0511       | 0.0376       | 0.0321       | 0.0226       |
| 3300        | uniform          | 0.0152             | 0.0086       | 0.0392       | 0.0407       | 0.0268       | 0.0218       | 0.0166       |
| 6600        | uniform          | 0.0097             | 0.0062       | 0.0278       | 0.0281       | 0.0175       | 0.0160       | 0.0120       |
| 9900        | uniform          | 0.0082             | 0.0048       | 0.0219       | 0.0203       | 0.0150       | 0.0135       | 0.0098       |
| 13200       | uniform          | 0.0069             | 0.0042       | 0.0190       | 0.0184       | 0.0120       | 0.0111       | 0.0079       |
| 19800       | uniform          | 0.0055             | 0.0033       | 0.0149       | 0.0145       | 0.0094       | 0.0092       | 0.0074       |
| 1650        | population       | 0.0192             | 0.0135       | 0.0570       | 0.0536       | 0.0366       | 0.0300       | 0.0215       |
| 3300        | population       | 0.0142             | 0.0090       | 0.0402       | 0.0416       | 0.0277       | 0.0223       | 0.0173       |
| 6600        | population       | 0.0097             | 0.0065       | 0.0292       | 0.0269       | 0.0176       | 0.0159       | 0.0117       |
| 9900        | population       | 0.0079             | 0.0050       | 0.0233       | 0.0224       | 0.0152       | 0.0130       | 0.0101       |
| 13200       | population       | 0.0071             | 0.0043       | 0.0201       | 0.0200       | 0.0128       | 0.0115       | 0.0081       |
| 19800       | population       | 0.0059             | 0.0038       | 0.0174       | 0.0162       | 0.0096       | 0.0091       | 0.0076       |
| <b>Size</b> | <b>Structure</b> | <b>OverallFoi</b>  | <b>Foi1</b>  | <b>Foi2</b>  | <b>Foi3</b>  | <b>Foi4</b>  | <b>Foi5</b>  | <b>Foi6</b>  |
| 1650        | survey           | 0.0050             | 0.0167       | 0.0174       | 0.0117       | 0.0117       | 0.0054       | 0.0064       |
| 3300        | survey           | 0.0036             | 0.0131       | 0.0130       | 0.0084       | 0.0091       | 0.0040       | 0.0056       |
| 6600        | survey           | 0.0025             | 0.0087       | 0.0089       | 0.0057       | 0.0065       | 0.0028       | 0.0038       |
| 9900        | survey           | 0.0023             | 0.0070       | 0.0071       | 0.0049       | 0.0053       | 0.0024       | 0.0036       |
| 13200       | survey           | 0.0020             | 0.0058       | 0.0059       | 0.0044       | 0.0045       | 0.0020       | 0.0031       |
| 19800       | survey           | 0.0018             | 0.0053       | 0.0054       | 0.0034       | 0.0039       | 0.0017       | 0.0025       |
| 1650        | uniform          | 0.0037             | 0.0223       | 0.0223       | 0.0131       | 0.0142       | 0.0055       | 0.0065       |
| 3300        | uniform          | 0.0030             | 0.0154       | 0.0168       | 0.0093       | 0.0098       | 0.0039       | 0.0051       |
| 6600        | uniform          | 0.0019             | 0.0110       | 0.0117       | 0.0065       | 0.0072       | 0.0027       | 0.0038       |
| 9900        | uniform          | 0.0018             | 0.0086       | 0.0090       | 0.0055       | 0.0062       | 0.0022       | 0.0033       |
| 13200       | uniform          | 0.0014             | 0.0075       | 0.0079       | 0.0045       | 0.0052       | 0.0019       | 0.0027       |
| 19800       | uniform          | 0.0013             | 0.0059       | 0.0062       | 0.0036       | 0.0041       | 0.0016       | 0.0021       |
| 1650        | population       | 0.0038             | 0.0241       | 0.0240       | 0.0141       | 0.0138       | 0.0055       | 0.0067       |
| 3300        | population       | 0.0029             | 0.0161       | 0.0174       | 0.0094       | 0.0101       | 0.0040       | 0.0054       |
| 6600        | population       | 0.0021             | 0.0118       | 0.0120       | 0.0069       | 0.0077       | 0.0027       | 0.0040       |
| 9900        | population       | 0.0019             | 0.0090       | 0.0097       | 0.0055       | 0.0060       | 0.0022       | 0.0034       |
| 13200       | population       | 0.0015             | 0.0077       | 0.0083       | 0.0045       | 0.0053       | 0.0020       | 0.0029       |
| 19800       | population       | 0.0013             | 0.0068       | 0.0071       | 0.0036       | 0.0045       | 0.0017       | 0.0023       |

| <b>Size</b> | <b>Structure</b> | <b>R<sub>0</sub></b> | <b>ASI</b> |
|-------------|------------------|----------------------|------------|
| 1650        | survey           | 0.3125               | 1.8265     |
| 3300        | survey           | 0.2283               | 1.3602     |
| 6600        | survey           | 0.1537               | 0.9046     |
| 9900        | survey           | 0.1415               | 0.8382     |
| 13200       | survey           | 0.1198               | 0.7077     |
| 19800       | survey           | 0.1081               | 0.6394     |
| 1650        | uniform          | 0.2661               | 1.5597     |
| 3300        | uniform          | 0.2004               | 1.1785     |
| 6600        | uniform          | 0.1320               | 0.7797     |
| 9900        | uniform          | 0.1140               | 0.6742     |
| 13200       | uniform          | 0.0927               | 0.5481     |
| 19800       | uniform          | 0.0817               | 0.4841     |
| 1650        | population       | 0.2550               | 1.4957     |
| 3300        | population       | 0.1932               | 1.1408     |
| 6600        | population       | 0.1361               | 0.8059     |
| 9900        | population       | 0.1161               | 0.6863     |
| 13200       | population       | 0.0951               | 0.5629     |
| 19800       | population       | 0.0843               | 0.4997     |

**Table S11.** Parvovirus B19 serological data – MSIR piecewise constant force of infection

| <b>Size</b> | <b>Structure</b> | <b>OverallPrev</b> | <b>Prev1</b> | <b>Prev2</b> | <b>Prev3</b> | <b>Prev4</b> | <b>Prev5</b> | <b>Prev6</b> |
|-------------|------------------|--------------------|--------------|--------------|--------------|--------------|--------------|--------------|
| 1650        | survey           | 0.0205             | 0.0277       | 0.0483       | 0.0498       | 0.0378       | 0.0341       | 0.0284       |
| 3300        | survey           | 0.0150             | 0.0203       | 0.0383       | 0.0350       | 0.0246       | 0.0235       | 0.0199       |
| 6600        | survey           | 0.0102             | 0.0149       | 0.0264       | 0.0241       | 0.0195       | 0.0178       | 0.0147       |
| 9900        | survey           | 0.0092             | 0.0118       | 0.0204       | 0.0199       | 0.0153       | 0.0140       | 0.0130       |
| 13200       | survey           | 0.0074             | 0.0099       | 0.0183       | 0.0169       | 0.0130       | 0.0118       | 0.0105       |
| 19800       | survey           | 0.0074             | 0.0080       | 0.0156       | 0.0142       | 0.0099       | 0.0098       | 0.0099       |
| 1650        | uniform          | 0.0199             | 0.0331       | 0.0633       | 0.0569       | 0.0458       | 0.0371       | 0.0225       |
| 3300        | uniform          | 0.0144             | 0.0232       | 0.0470       | 0.0471       | 0.0370       | 0.0272       | 0.0161       |
| 6600        | uniform          | 0.0100             | 0.0163       | 0.0322       | 0.0304       | 0.0238       | 0.0183       | 0.0128       |
| 9900        | uniform          | 0.0079             | 0.0140       | 0.0261       | 0.0248       | 0.0200       | 0.0155       | 0.0099       |
| 13200       | uniform          | 0.0067             | 0.0121       | 0.0235       | 0.0225       | 0.0183       | 0.0131       | 0.0081       |
| 19800       | uniform          | 0.0057             | 0.0095       | 0.0187       | 0.0183       | 0.0138       | 0.0103       | 0.0075       |
| 1650        | population       | 0.0196             | 0.0387       | 0.0683       | 0.0614       | 0.0473       | 0.0356       | 0.0223       |
| 3300        | population       | 0.0141             | 0.0253       | 0.0473       | 0.0468       | 0.0385       | 0.0266       | 0.0159       |
| 6600        | population       | 0.0097             | 0.0181       | 0.0343       | 0.0330       | 0.0245       | 0.0181       | 0.0120       |
| 9900        | population       | 0.0079             | 0.0148       | 0.0272       | 0.0256       | 0.0196       | 0.0150       | 0.0098       |
| 13200       | population       | 0.0072             | 0.0128       | 0.0241       | 0.0235       | 0.0189       | 0.0131       | 0.0079       |
| 19800       | population       | 0.0058             | 0.0103       | 0.0200       | 0.0202       | 0.0148       | 0.0103       | 0.0074       |
| <b>Size</b> | <b>Structure</b> | <b>OverallFoi</b>  | <b>Foi1</b>  | <b>Foi2</b>  | <b>Foi3</b>  | <b>Foi4</b>  | <b>Foi5</b>  | <b>Foi6</b>  |
| 1650        | survey           | 0.0053             | 0.0578       | 0.0453       | 0.0430       | 0.0355       | 0.0123       | 0.0120       |
| 3300        | survey           | 0.0037             | 0.0423       | 0.0315       | 0.0298       | 0.0291       | 0.0098       | 0.0091       |
| 6600        | survey           | 0.0027             | 0.0311       | 0.0241       | 0.0240       | 0.0212       | 0.0073       | 0.0057       |
| 9900        | survey           | 0.0025             | 0.0244       | 0.0211       | 0.0199       | 0.0173       | 0.0055       | 0.0051       |
| 13200       | survey           | 0.0021             | 0.0205       | 0.0160       | 0.0165       | 0.0139       | 0.0047       | 0.0048       |
| 19800       | survey           | 0.0018             | 0.0167       | 0.0137       | 0.0144       | 0.0119       | 0.0040       | 0.0036       |
| 1650        | uniform          | 0.0047             | 0.0692       | 0.0598       | 0.0575       | 0.0375       | 0.0141       | 0.0109       |
| 3300        | uniform          | 0.0036             | 0.0484       | 0.0414       | 0.0457       | 0.0338       | 0.0108       | 0.0075       |
| 6600        | uniform          | 0.0023             | 0.0339       | 0.0288       | 0.0300       | 0.0269       | 0.0082       | 0.0054       |
| 9900        | uniform          | 0.0018             | 0.0291       | 0.0235       | 0.0244       | 0.0206       | 0.0063       | 0.0044       |
| 13200       | uniform          | 0.0016             | 0.0251       | 0.0206       | 0.0216       | 0.0195       | 0.0051       | 0.0034       |
| 19800       | uniform          | 0.0014             | 0.0197       | 0.0154       | 0.0173       | 0.0150       | 0.0044       | 0.0031       |
| 1650        | population       | 0.0046             | 0.0806       | 0.0641       | 0.0583       | 0.0388       | 0.0138       | 0.0103       |
| 3300        | population       | 0.0036             | 0.0527       | 0.0461       | 0.0474       | 0.0339       | 0.0104       | 0.0074       |
| 6600        | population       | 0.0024             | 0.0377       | 0.0304       | 0.0297       | 0.0258       | 0.0082       | 0.0054       |
| 9900        | population       | 0.0019             | 0.0309       | 0.0256       | 0.0259       | 0.0225       | 0.0065       | 0.0045       |
| 13200       | population       | 0.0017             | 0.0266       | 0.0223       | 0.0224       | 0.0185       | 0.0056       | 0.0038       |
| 19800       | population       | 0.0015             | 0.0214       | 0.0184       | 0.0189       | 0.0155       | 0.0046       | 0.0032       |

**Table S12.** Parvovirus B19 serological data – MSIRWb-ext AW model

| <b>Size</b> | <b>Structure</b> | <b>OverallPrev</b> | <b>Prev1</b> | <b>Prev2</b> | <b>Prev3</b> | <b>Prev4</b> | <b>Prev5</b> | <b>Prev6</b> |
|-------------|------------------|--------------------|--------------|--------------|--------------|--------------|--------------|--------------|
| 1650        | survey           | 0.0267             | 0.0078       | 0.0351       | 0.0440       | 0.0311       | 0.0430       | 0.0406       |
| 3300        | survey           | 0.0194             | 0.0060       | 0.0273       | 0.0362       | 0.0207       | 0.0351       | 0.0297       |
| 6600        | survey           | 0.0140             | 0.0036       | 0.0163       | 0.0219       | 0.0149       | 0.0243       | 0.0209       |
| 9900        | survey           | 0.0122             | 0.0032       | 0.0147       | 0.0182       | 0.0124       | 0.0210       | 0.0192       |
| 13200       | survey           | 0.0092             | 0.0030       | 0.0133       | 0.0163       | 0.0105       | 0.0203       | 0.0145       |
| 19800       | survey           | 0.0083             | 0.0024       | 0.0107       | 0.0136       | 0.0091       | 0.0173       | 0.0118       |
| 1650        | uniform          | 0.0203             | 0.0092       | 0.0415       | 0.0546       | 0.0345       | 0.0392       | 0.0252       |
| 3300        | uniform          | 0.0155             | 0.0065       | 0.0301       | 0.0408       | 0.0260       | 0.0301       | 0.0180       |
| 6600        | uniform          | 0.0109             | 0.0048       | 0.0221       | 0.0295       | 0.0177       | 0.0207       | 0.0135       |
| 9900        | uniform          | 0.0081             | 0.0039       | 0.0180       | 0.0241       | 0.0133       | 0.0178       | 0.0102       |
| 13200       | uniform          | 0.0070             | 0.0035       | 0.0159       | 0.0216       | 0.0125       | 0.0167       | 0.0086       |
| 19800       | uniform          | 0.0056             | 0.0027       | 0.0123       | 0.0164       | 0.0096       | 0.0108       | 0.0077       |
| 1650        | population       | 0.0197             | 0.0094       | 0.0427       | 0.0569       | 0.0358       | 0.0406       | 0.0235       |
| 3300        | population       | 0.0151             | 0.0069       | 0.0316       | 0.0422       | 0.0260       | 0.0275       | 0.0167       |
| 6600        | population       | 0.0101             | 0.0049       | 0.0222       | 0.0302       | 0.0178       | 0.0203       | 0.0126       |
| 9900        | population       | 0.0086             | 0.0040       | 0.0182       | 0.0248       | 0.0147       | 0.0162       | 0.0103       |
| 13200       | population       | 0.0070             | 0.0038       | 0.0175       | 0.0237       | 0.0128       | 0.0158       | 0.0086       |
| 19800       | population       | 0.0057             | 0.0030       | 0.0137       | 0.0185       | 0.0102       | 0.0106       | 0.0078       |
| <b>Size</b> | <b>Structure</b> | <b>OverallFoi</b>  | <b>Foi1</b>  | <b>Foi2</b>  | <b>Foi3</b>  | <b>Foi4</b>  | <b>Foi5</b>  | <b>Foi6</b>  |
| 1650        | survey           | 0.0081             | 0.0169       | 0.0188       | 0.0160       | 0.0017       | 0.0048       | 0.0076       |
| 3300        | survey           | 0.0064             | 0.0131       | 0.0146       | 0.0127       | 0.0014       | 0.0036       | 0.0060       |
| 6600        | survey           | 0.0042             | 0.0079       | 0.0088       | 0.0076       | 0.0008       | 0.0022       | 0.0042       |
| 9900        | survey           | 0.0039             | 0.0070       | 0.0078       | 0.0068       | 0.0007       | 0.0019       | 0.0040       |
| 13200       | survey           | 0.0035             | 0.0064       | 0.0072       | 0.0062       | 0.0006       | 0.0018       | 0.0036       |
| 19800       | survey           | 0.0025             | 0.0052       | 0.0058       | 0.0050       | 0.0005       | 0.0015       | 0.0025       |
| 1650        | uniform          | 0.0095             | 0.0198       | 0.0220       | 0.0188       | 0.0020       | 0.0055       | 0.0079       |
| 3300        | uniform          | 0.0068             | 0.0140       | 0.0155       | 0.0134       | 0.0014       | 0.0038       | 0.0059       |
| 6600        | uniform          | 0.0051             | 0.0103       | 0.0114       | 0.0099       | 0.0011       | 0.0028       | 0.0045       |
| 9900        | uniform          | 0.0042             | 0.0085       | 0.0095       | 0.0083       | 0.0009       | 0.0024       | 0.0039       |
| 13200       | uniform          | 0.0038             | 0.0077       | 0.0086       | 0.0074       | 0.0008       | 0.0022       | 0.0037       |
| 19800       | uniform          | 0.0028             | 0.0058       | 0.0065       | 0.0056       | 0.0006       | 0.0016       | 0.0024       |
| 1650        | population       | 0.0099             | 0.0203       | 0.0225       | 0.0193       | 0.0020       | 0.0056       | 0.0085       |
| 3300        | population       | 0.0072             | 0.0149       | 0.0165       | 0.0142       | 0.0015       | 0.0041       | 0.0061       |
| 6600        | population       | 0.0053             | 0.0107       | 0.0118       | 0.0102       | 0.0011       | 0.0030       | 0.0047       |
| 9900        | population       | 0.0042             | 0.0086       | 0.0096       | 0.0083       | 0.0009       | 0.0024       | 0.0035       |
| 13200       | population       | 0.0041             | 0.0083       | 0.0093       | 0.0081       | 0.0009       | 0.0023       | 0.0037       |
| 19800       | population       | 0.0031             | 0.0064       | 0.0072       | 0.0062       | 0.0007       | 0.0018       | 0.0026       |



| Size  | Structure  | $R_0$  | $R_{\text{eff}}$ | ASI    | $\phi$ |
|-------|------------|--------|------------------|--------|--------|
| 1650  | survey     | 0.4543 | 0.0088           | 1.2815 | 1.0859 |
| 3300  | survey     | 0.3533 | 0.0069           | 1.0170 | 0.4921 |
| 6600  | survey     | 0.2126 | 0.0042           | 0.6099 | 0.3999 |
| 9900  | survey     | 0.1882 | 0.0037           | 0.5419 | 0.3306 |
| 13200 | survey     | 0.1732 | 0.0034           | 0.4963 | 0.3162 |
| 19800 | survey     | 0.1406 | 0.0027           | 0.3992 | 0.1803 |
| 1650  | uniform    | 0.5320 | 0.0103           | 1.5003 | 0.4664 |
| 3300  | uniform    | 0.3756 | 0.0073           | 1.0588 | 0.3797 |
| 6600  | uniform    | 0.2757 | 0.0054           | 0.7776 | 0.2191 |
| 9900  | uniform    | 0.2298 | 0.0045           | 0.6626 | 0.2534 |
| 13200 | uniform    | 0.2067 | 0.0040           | 0.5953 | 0.1764 |
| 19800 | uniform    | 0.1573 | 0.0031           | 0.4478 | 0.0994 |
| 1650  | population | 0.5448 | 0.0106           | 1.5179 | 0.5419 |
| 3300  | population | 0.3988 | 0.0078           | 1.1245 | 0.3904 |
| 6600  | population | 0.2861 | 0.0056           | 0.8054 | 0.1948 |
| 9900  | population | 0.2315 | 0.0045           | 0.6633 | 0.1386 |
| 13200 | population | 0.2245 | 0.0044           | 0.6458 | 0.1613 |
| 19800 | population | 0.1735 | 0.0034           | 0.4946 | 0.0994 |

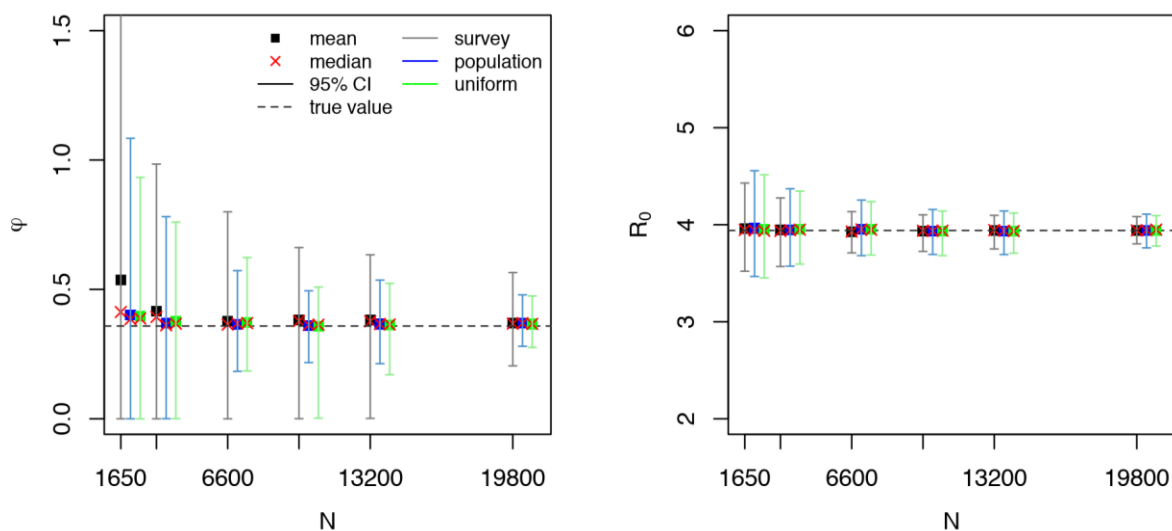

**Figure S4.** Parvovirus B19 serological data: mean, median, and 95% confidence interval for the relative boosting factor  $\phi$  (left) and basic reproduction number  $R_0$  (right) over 500 simulations as a function of the total number of sampled individuals ( $N$ ) for the MSIR model allowing for age-specific waning of disease-acquired antibodies and boosting of low immunity (MSIRWb-ext AW) model.

“True” value is the value estimated using the model on the observed serological data (with integer age values). The y-axes have different ranges of values for better legibility.

## Optimal distributions

In Tables S13-20, the optimal distributions of samples for the overall and age-specific seroprevalence and force of infection by pathogen, model, and sample size are given. The age groups (Group 1-6) are [1,2), [2,6), [6,12), [12,19), [19,31), and [31,65] years.

**Table S13.** Measles serological data – Logistic model with piecewise constant prevalence

| <b>Size</b>                    | <b>Group1<br/>%</b> | <b>Group2<br/>%</b> | <b>Group3<br/>%</b> | <b>Group4<br/>%</b> | <b>Group5<br/>%</b> | <b>Group6<br/>%</b> | <b>Precision</b> |
|--------------------------------|---------------------|---------------------|---------------------|---------------------|---------------------|---------------------|------------------|
| <b>Overall prevalence</b>      |                     |                     |                     |                     |                     |                     |                  |
| 1650                           | 10                  | 10                  | 10                  | 20                  | 20                  | 30                  | 0.0104           |
| 3300                           | 10                  | 20                  | 10                  | 10                  | 20                  | 30                  | 0.0081           |
| 6600                           | 10                  | 10                  | 10                  | 20                  | 20                  | 30                  | 0.0053           |
| 9900                           | 10                  | 10                  | 10                  | 10                  | 30                  | 30                  | 0.0042           |
| 13200                          | 10                  | 10                  | 10                  | 20                  | 20                  | 30                  | 0.0036           |
| 19800                          | 10                  | 10                  | 10                  | 20                  | 20                  | 30                  | 0.0031           |
| <b>Prevalence by age group</b> |                     |                     |                     |                     |                     |                     |                  |
| 1650                           | 20                  | 20                  | 10                  | 20                  | 20                  | 10                  | 0.1950           |
| 3300                           | 30                  | 10                  | 20                  | 10                  | 20                  | 10                  | 0.1332           |
| 6600                           | 20                  | 20                  | 10                  | 20                  | 20                  | 10                  | 0.0953           |
| 9900                           | 20                  | 20                  | 10                  | 20                  | 20                  | 10                  | 0.0759           |
| 13200                          | 30                  | 10                  | 20                  | 10                  | 20                  | 10                  | 0.0675           |
| 19800                          | 20                  | 10                  | 20                  | 10                  | 20                  | 20                  | 0.0567           |

**Table S14.** Mumps serological data – Logistic model with piecewise constant prevalence

| <b>Size</b>                    | <b>Group1<br/>%</b> | <b>Group2<br/>%</b> | <b>Group3<br/>%</b> | <b>Group4<br/>%</b> | <b>Group5<br/>%</b> | <b>Group6<br/>%</b> | <b>Precision</b> |
|--------------------------------|---------------------|---------------------|---------------------|---------------------|---------------------|---------------------|------------------|
| <b>Overall prevalence</b>      |                     |                     |                     |                     |                     |                     |                  |
| 1650                           | 10                  | 10                  | 10                  | 10                  | 10                  | 50                  | 0.0191           |
| 3300                           | 10                  | 20                  | 10                  | 10                  | 10                  | 40                  | 0.0143           |
| 6600                           | 10                  | 10                  | 10                  | 10                  | 10                  | 50                  | 0.0097           |
| 9900                           | 10                  | 10                  | 10                  | 10                  | 20                  | 40                  | 0.0080           |
| 13200                          | 10                  | 10                  | 10                  | 10                  | 10                  | 50                  | 0.0070           |
| 19800                          | 10                  | 10                  | 10                  | 20                  | 10                  | 40                  | 0.0062           |
| <b>Prevalence by age group</b> |                     |                     |                     |                     |                     |                     |                  |
| 1650                           | 20                  | 20                  | 10                  | 10                  | 20                  | 20                  | 0.2642           |
| 3300                           | 20                  | 10                  | 30                  | 10                  | 20                  | 10                  | 0.1877           |
| 6600                           | 20                  | 20                  | 10                  | 10                  | 20                  | 20                  | 0.1289           |
| 9900                           | 20                  | 10                  | 20                  | 10                  | 20                  | 20                  | 0.1041           |
| 13200                          | 20                  | 10                  | 20                  | 10                  | 20                  | 20                  | 0.0916           |
| 19800                          | 20                  | 20                  | 10                  | 10                  | 20                  | 20                  | 0.0752           |

**Table S15.** Rubella serological data – Logistic model with piecewise constant prevalence

| <b>Size</b>                    | <b>Group1<br/>%</b> | <b>Group2<br/>%</b> | <b>Group3<br/>%</b> | <b>Group4<br/>%</b> | <b>Group5<br/>%</b> | <b>Group6<br/>%</b> | <b>Precision</b> |
|--------------------------------|---------------------|---------------------|---------------------|---------------------|---------------------|---------------------|------------------|
| <b>Overall prevalence</b>      |                     |                     |                     |                     |                     |                     |                  |
| 1650                           | 10                  | 10                  | 10                  | 20                  | 10                  | 40                  | 0.0106           |
| 3300                           | 10                  | 10                  | 10                  | 20                  | 10                  | 40                  | 0.0077           |
| 6600                           | 10                  | 10                  | 10                  | 10                  | 20                  | 40                  | 0.0054           |
| 9900                           | 10                  | 10                  | 10                  | 10                  | 30                  | 30                  | 0.0044           |
| 13200                          | 10                  | 10                  | 10                  | 10                  | 20                  | 40                  | 0.0037           |
| 19800                          | 10                  | 10                  | 10                  | 20                  | 10                  | 40                  | 0.0031           |
| <b>Prevalence by age group</b> |                     |                     |                     |                     |                     |                     |                  |
| 1650                           | 20                  | 20                  | 20                  | 10                  | 10                  | 20                  | 0.1793           |
| 3300                           | 30                  | 10                  | 20                  | 10                  | 20                  | 10                  | 0.1269           |
| 6600                           | 20                  | 20                  | 20                  | 10                  | 10                  | 20                  | 0.0873           |
| 9900                           | 30                  | 20                  | 10                  | 10                  | 10                  | 20                  | 0.0735           |
| 13200                          | 30                  | 10                  | 30                  | 10                  | 10                  | 10                  | 0.0635           |
| 19800                          | 30                  | 10                  | 20                  | 10                  | 20                  | 10                  | 0.0510           |

**Table S16.** VZV serological data – Exponentially damped model

| <b>Size</b>                            | <b>Group1<br/>%</b> | <b>Group2<br/>%</b> | <b>Group3<br/>%</b> | <b>Group4<br/>%</b> | <b>Group5<br/>%</b> | <b>Group6<br/>%</b> | <b>Precision</b> |
|----------------------------------------|---------------------|---------------------|---------------------|---------------------|---------------------|---------------------|------------------|
| <b>Overall prevalence</b>              |                     |                     |                     |                     |                     |                     |                  |
| 1650                                   | 30                  | 10                  | 10                  | 30                  | 10                  | 10                  | 0.0048           |
| 3300                                   | 10                  | 30                  | 10                  | 10                  | 30                  | 10                  | 0.0050           |
| 6600                                   | 10                  | 10                  | 10                  | 10                  | 40                  | 20                  | 0.0020           |
| 9900                                   | 10                  | 10                  | 10                  | 10                  | 40                  | 20                  | 0.0021           |
| 13200                                  | 50                  | 10                  | 10                  | 10                  | 10                  | 10                  | 0.0020           |
| 19800                                  | 10                  | 10                  | 20                  | 10                  | 30                  | 20                  | 0.0019           |
| <b>Prevalence by age group</b>         |                     |                     |                     |                     |                     |                     |                  |
| 1650                                   | 20                  | 20                  | 20                  | 20                  | 10                  | 10                  | 0.1081           |
| 3300                                   | 20                  | 40                  | 10                  | 10                  | 10                  | 10                  | 0.0859           |
| 6600                                   | 10                  | 20                  | 10                  | 40                  | 10                  | 10                  | 0.0585           |
| 9900                                   | 10                  | 20                  | 10                  | 10                  | 30                  | 20                  | 0.0520           |
| 13200                                  | 10                  | 30                  | 20                  | 10                  | 10                  | 20                  | 0.0420           |
| 19800                                  | 20                  | 20                  | 30                  | 10                  | 10                  | 10                  | 0.0342           |
| <b>Overall force of infection</b>      |                     |                     |                     |                     |                     |                     |                  |
| 1650                                   | 20                  | 20                  | 20                  | 10                  | 20                  | 10                  | 0.0264           |
| 3300                                   | 10                  | 30                  | 10                  | 10                  | 30                  | 10                  | 0.0255           |
| 6600                                   | 10                  | 10                  | 10                  | 10                  | 40                  | 20                  | 0.0094           |
| 9900                                   | 10                  | 10                  | 10                  | 10                  | 40                  | 20                  | 0.0101           |
| 13200                                  | 50                  | 10                  | 10                  | 10                  | 10                  | 10                  | 0.0096           |
| 19800                                  | 10                  | 10                  | 10                  | 20                  | 30                  | 20                  | 0.0096           |
| <b>Force of infection by age group</b> |                     |                     |                     |                     |                     |                     |                  |
| 1650                                   | 10                  | 20                  | 10                  | 10                  | 30                  | 20                  | 0.2593           |
| 3300                                   | 10                  | 20                  | 20                  | 10                  | 20                  | 20                  | 0.1842           |
| 6600                                   | 10                  | 20                  | 20                  | 20                  | 10                  | 20                  | 0.1208           |
| 9900                                   | 10                  | 20                  | 10                  | 10                  | 10                  | 40                  | 0.0991           |
| 13200                                  | 10                  | 30                  | 20                  | 10                  | 10                  | 20                  | 0.0883           |
| 19800                                  | 20                  | 20                  | 20                  | 10                  | 10                  | 20                  | 0.0696           |

**Table S17.** VZV serological data – MSIR piecewise constant force of infection

| <b>Size</b>                            | <b>Group1<br/>%</b> | <b>Group2<br/>%</b> | <b>Group3<br/>%</b> | <b>Group4<br/>%</b> | <b>Group5<br/>%</b> | <b>Group6<br/>%</b> | <b>Precision</b> |
|----------------------------------------|---------------------|---------------------|---------------------|---------------------|---------------------|---------------------|------------------|
| <b>Overall prevalence</b>              |                     |                     |                     |                     |                     |                     |                  |
| 1650                                   | 10                  | 20                  | 10                  | 10                  | 30                  | 20                  | 0.0069           |
| 3300                                   | 10                  | 20                  | 20                  | 10                  | 30                  | 10                  | 0.0048           |
| 6600                                   | 10                  | 20                  | 10                  | 10                  | 30                  | 20                  | 0.0032           |
| 9900                                   | 10                  | 10                  | 20                  | 10                  | 30                  | 20                  | 0.0026           |
| 13200                                  | 10                  | 10                  | 20                  | 10                  | 30                  | 20                  | 0.0024           |
| 19800                                  | 10                  | 10                  | 20                  | 10                  | 30                  | 20                  | 0.0020           |
| <b>Prevalence by age group</b>         |                     |                     |                     |                     |                     |                     |                  |
| 1650                                   | 10                  | 40                  | 10                  | 20                  | 10                  | 10                  | 0.1229           |
| 3300                                   | 20                  | 30                  | 20                  | 10                  | 10                  | 10                  | 0.0914           |
| 6600                                   | 10                  | 40                  | 10                  | 20                  | 10                  | 10                  | 0.0630           |
| 9900                                   | 10                  | 50                  | 10                  | 10                  | 10                  | 10                  | 0.0538           |
| 13200                                  | 10                  | 30                  | 20                  | 10                  | 20                  | 10                  | 0.0464           |
| 19800                                  | 10                  | 40                  | 20                  | 10                  | 10                  | 10                  | 0.0374           |
| <b>Overall force of infection</b>      |                     |                     |                     |                     |                     |                     |                  |
| 1650                                   | 10                  | 10                  | 40                  | 10                  | 10                  | 20                  | 0.0356           |
| 3300                                   | 10                  | 10                  | 30                  | 10                  | 30                  | 10                  | 0.0266           |
| 6600                                   | 10                  | 10                  | 30                  | 10                  | 20                  | 20                  | 0.0187           |
| 9900                                   | 10                  | 10                  | 20                  | 10                  | 20                  | 30                  | 0.0144           |
| 13200                                  | 10                  | 10                  | 20                  | 10                  | 30                  | 20                  | 0.0132           |
| 19800                                  | 10                  | 10                  | 20                  | 10                  | 30                  | 20                  | 0.0106           |
| <b>Force of infection by age group</b> |                     |                     |                     |                     |                     |                     |                  |
| 1650                                   | 10                  | 40                  | 10                  | 10                  | 20                  | 10                  | 0.5954           |
| 3300                                   | 10                  | 30                  | 10                  | 30                  | 10                  | 10                  | 0.5147           |
| 6600                                   | 10                  | 20                  | 10                  | 10                  | 10                  | 40                  | 0.3494           |
| 9900                                   | 10                  | 10                  | 20                  | 10                  | 10                  | 40                  | 0.2953           |
| 13200                                  | 10                  | 10                  | 20                  | 20                  | 10                  | 30                  | 0.2529           |
| 19800                                  | 10                  | 10                  | 20                  | 10                  | 20                  | 30                  | 0.1976           |

**Table S18.** Parvovirus B19 serological data – Exponentially damped model

| <b>Size</b>                            | <b>Group1<br/>%</b> | <b>Group2<br/>%</b> | <b>Group3<br/>%</b> | <b>Group4<br/>%</b> | <b>Group5<br/>%</b> | <b>Group6<br/>%</b> | <b>Precision</b> |
|----------------------------------------|---------------------|---------------------|---------------------|---------------------|---------------------|---------------------|------------------|
| <b>Overall prevalence</b>              |                     |                     |                     |                     |                     |                     |                  |
| 1650                                   | 10                  | 10                  | 20                  | 10                  | 20                  | 30                  | 0.0214           |
| 3300                                   | 10                  | 10                  | 10                  | 20                  | 10                  | 40                  | 0.0146           |
| 6600                                   | 10                  | 10                  | 10                  | 20                  | 10                  | 40                  | 0.0107           |
| 9900                                   | 10                  | 10                  | 10                  | 10                  | 20                  | 40                  | 0.0088           |
| 13200                                  | 20                  | 10                  | 10                  | 10                  | 20                  | 30                  | 0.0074           |
| 19800                                  | 10                  | 10                  | 10                  | 10                  | 20                  | 40                  | 0.0063           |
| <b>Prevalence by age group</b>         |                     |                     |                     |                     |                     |                     |                  |
| 1650                                   | 10                  | 20                  | 10                  | 20                  | 20                  | 20                  | 0.1725           |
| 3300                                   | 10                  | 20                  | 10                  | 20                  | 10                  | 30                  | 0.1258           |
| 6600                                   | 10                  | 10                  | 30                  | 10                  | 20                  | 20                  | 0.0888           |
| 9900                                   | 10                  | 30                  | 10                  | 20                  | 10                  | 20                  | 0.0748           |
| 13200                                  | 10                  | 20                  | 20                  | 10                  | 10                  | 30                  | 0.0634           |
| 19800                                  | 10                  | 20                  | 20                  | 10                  | 20                  | 20                  | 0.0536           |
| <b>Overall force of infection</b>      |                     |                     |                     |                     |                     |                     |                  |
| 1650                                   | 10                  | 10                  | 10                  | 10                  | 10                  | 50                  | 0.0043           |
| 3300                                   | 10                  | 10                  | 10                  | 10                  | 10                  | 50                  | 0.0030           |
| 6600                                   | 10                  | 10                  | 10                  | 10                  | 10                  | 50                  | 0.0021           |
| 9900                                   | 10                  | 10                  | 10                  | 10                  | 10                  | 50                  | 0.0018           |
| 13200                                  | 10                  | 10                  | 10                  | 10                  | 10                  | 50                  | 0.0015           |
| 19800                                  | 10                  | 10                  | 10                  | 10                  | 10                  | 50                  | 0.0014           |
| <b>Force of infection by age group</b> |                     |                     |                     |                     |                     |                     |                  |
| 1650                                   | 10                  | 30                  | 10                  | 20                  | 10                  | 20                  | 0.0630           |
| 3300                                   | 10                  | 30                  | 10                  | 20                  | 10                  | 20                  | 0.0458           |
| 6600                                   | 10                  | 40                  | 10                  | 10                  | 10                  | 20                  | 0.0329           |
| 9900                                   | 10                  | 30                  | 10                  | 10                  | 20                  | 20                  | 0.0264           |
| 13200                                  | 10                  | 30                  | 10                  | 10                  | 20                  | 20                  | 0.0232           |
| 19800                                  | 10                  | 20                  | 20                  | 10                  | 20                  | 20                  | 0.0195           |

**Table S19.** Parvovirus B19 serological data – MSIR piecewise constant force of infection

| <b>Size</b>                            | <b>Group1<br/>%</b> | <b>Group2<br/>%</b> | <b>Group3<br/>%</b> | <b>Group4<br/>%</b> | <b>Group5<br/>%</b> | <b>Group6<br/>%</b> | <b>Precision</b> |
|----------------------------------------|---------------------|---------------------|---------------------|---------------------|---------------------|---------------------|------------------|
| <b>Overall prevalence</b>              |                     |                     |                     |                     |                     |                     |                  |
| 1650                                   | 10                  | 10                  | 20                  | 10                  | 20                  | 30                  | 0.0212           |
| 3300                                   | 10                  | 10                  | 10                  | 10                  | 20                  | 40                  | 0.0147           |
| 6600                                   | 10                  | 10                  | 10                  | 10                  | 30                  | 30                  | 0.0106           |
| 9900                                   | 10                  | 10                  | 10                  | 10                  | 20                  | 40                  | 0.0087           |
| 13200                                  | 10                  | 10                  | 10                  | 10                  | 20                  | 40                  | 0.0072           |
| 19800                                  | 10                  | 10                  | 10                  | 10                  | 10                  | 50                  | 0.0064           |
| <b>Prevalence by age group</b>         |                     |                     |                     |                     |                     |                     |                  |
| 1650                                   | 10                  | 20                  | 20                  | 10                  | 20                  | 20                  | 0.2059           |
| 3300                                   | 10                  | 10                  | 20                  | 10                  | 20                  | 30                  | 0.1527           |
| 6600                                   | 10                  | 20                  | 20                  | 20                  | 10                  | 20                  | 0.1086           |
| 9900                                   | 10                  | 30                  | 10                  | 20                  | 10                  | 20                  | 0.0869           |
| 13200                                  | 10                  | 20                  | 20                  | 10                  | 20                  | 20                  | 0.0754           |
| 19800                                  | 10                  | 20                  | 20                  | 20                  | 10                  | 20                  | 0.0628           |
| <b>Overall force of infection</b>      |                     |                     |                     |                     |                     |                     |                  |
| 1650                                   | 10                  | 10                  | 10                  | 10                  | 10                  | 50                  | 0.0047           |
| 3300                                   | 10                  | 10                  | 10                  | 10                  | 10                  | 50                  | 0.0033           |
| 6600                                   | 10                  | 10                  | 10                  | 10                  | 10                  | 50                  | 0.0022           |
| 9900                                   | 10                  | 10                  | 10                  | 10                  | 10                  | 50                  | 0.0020           |
| 13200                                  | 10                  | 10                  | 10                  | 10                  | 10                  | 50                  | 0.0017           |
| 19800                                  | 10                  | 10                  | 10                  | 10                  | 10                  | 50                  | 0.0015           |
| <b>Force of infection by age group</b> |                     |                     |                     |                     |                     |                     |                  |
| 1650                                   | 10                  | 40                  | 10                  | 10                  | 10                  | 20                  | 0.1692           |
| 3300                                   | 20                  | 20                  | 10                  | 20                  | 10                  | 20                  | 0.1299           |
| 6600                                   | 10                  | 20                  | 20                  | 10                  | 20                  | 20                  | 0.0936           |
| 9900                                   | 10                  | 20                  | 30                  | 10                  | 20                  | 10                  | 0.0762           |
| 13200                                  | 10                  | 20                  | 40                  | 10                  | 10                  | 10                  | 0.0669           |
| 19800                                  | 10                  | 20                  | 30                  | 10                  | 10                  | 20                  | 0.0536           |

**Table S20.** Parvovirus B19 serological data – MSIRWb-ext AW model

| <b>Size</b>                            | <b>Group1<br/>%</b> | <b>Group2<br/>%</b> | <b>Group3<br/>%</b> | <b>Group4<br/>%</b> | <b>Group5<br/>%</b> | <b>Group6<br/>%</b> | <b>Precision</b> |
|----------------------------------------|---------------------|---------------------|---------------------|---------------------|---------------------|---------------------|------------------|
| <b>Overall prevalence</b>              |                     |                     |                     |                     |                     |                     |                  |
| 1650                                   | 10                  | 10                  | 10                  | 20                  | 20                  | 30                  | 0.0237           |
| 3300                                   | 10                  | 10                  | 10                  | 10                  | 10                  | 50                  | 0.0156           |
| 6600                                   | 10                  | 10                  | 10                  | 10                  | 20                  | 40                  | 0.0115           |
| 9900                                   | 10                  | 10                  | 10                  | 10                  | 20                  | 40                  | 0.0090           |
| 13200                                  | 10                  | 10                  | 10                  | 10                  | 20                  | 40                  | 0.0075           |
| 19800                                  | 10                  | 10                  | 10                  | 10                  | 10                  | 50                  | 0.0067           |
| <b>Prevalence by age group</b>         |                     |                     |                     |                     |                     |                     |                  |
| 1650                                   | 10                  | 10                  | 20                  | 20                  | 20                  | 20                  | 0.1921           |
| 3300                                   | 10                  | 10                  | 20                  | 10                  | 10                  | 40                  | 0.1435           |
| 6600                                   | 10                  | 10                  | 10                  | 20                  | 20                  | 30                  | 0.1029           |
| 9900                                   | 10                  | 10                  | 20                  | 10                  | 10                  | 40                  | 0.0817           |
| 13200                                  | 10                  | 10                  | 20                  | 10                  | 10                  | 40                  | 0.0740           |
| 19800                                  | 10                  | 20                  | 20                  | 10                  | 10                  | 30                  | 0.0615           |
| <b>Overall force of infection</b>      |                     |                     |                     |                     |                     |                     |                  |
| 1650                                   | 10                  | 20                  | 20                  | 20                  | 10                  | 20                  | 0.0076           |
| 3300                                   | 10                  | 10                  | 30                  | 10                  | 20                  | 20                  | 0.0058           |
| 6600                                   | 10                  | 20                  | 20                  | 10                  | 10                  | 30                  | 0.0042           |
| 9900                                   | 10                  | 10                  | 20                  | 10                  | 10                  | 40                  | 0.0035           |
| 13200                                  | 10                  | 10                  | 20                  | 10                  | 10                  | 40                  | 0.0030           |
| 19800                                  | 10                  | 10                  | 20                  | 30                  | 10                  | 20                  | 0.0023           |
| <b>Force of infection by age group</b> |                     |                     |                     |                     |                     |                     |                  |
| 1650                                   | 10                  | 10                  | 30                  | 20                  | 10                  | 20                  | 0.0596           |
| 3300                                   | 10                  | 10                  | 30                  | 10                  | 20                  | 20                  | 0.0444           |
| 6600                                   | 10                  | 20                  | 20                  | 10                  | 10                  | 30                  | 0.0339           |
| 9900                                   | 10                  | 10                  | 20                  | 20                  | 10                  | 30                  | 0.0265           |
| 13200                                  | 10                  | 10                  | 20                  | 10                  | 10                  | 40                  | 0.0245           |
| 19800                                  | 10                  | 10                  | 20                  | 30                  | 10                  | 20                  | 0.0184           |



## References

- Goeyvaerts N, Hens N, Aerts M, Beutels P. Model structure analysis to estimate basic immunological processes and maternal risk for parvovirus B19. *Biostatistics*. 2011; 12: 283-302.
- Goeyvaerts N, Hens N, Ogunjimi B, Aerts M, Shkedy Z, Van Damme P, Beutels P. Estimating infectious disease parameters from data on social contacts and serological status. *Journal of the Royal Statistical Society Series C-Applied Statistics*. 2010; 59: 255-77.
- Santermans E, Goeyvaerts N, Melegaro A, Edmunds WJ, Faes C, Aerts M, Beutels P, Hens N. The social contact hypothesis under the assumption of endemic equilibrium: Elucidating the transmission potential of VZV in Europe. *Epidemics*. 2015; 11: 14-23.
